# Supplementary material for: Human antimicrobial protein hCAP18/LL-37 promotes a metastatic phenotype in breast cancer
Source: PubMed Central journal article supplement (PMC2687709; doi:10.1186/bcr2221), 2009-01-30

**Primary tumors**

**metastases/lymph nodes**

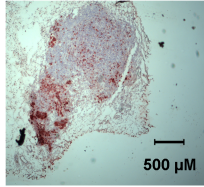

**MJ1105 hCAP derived tumors**

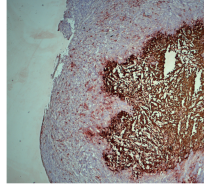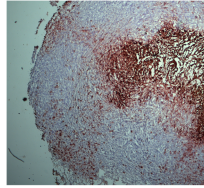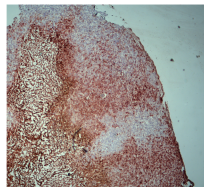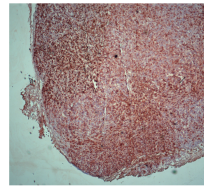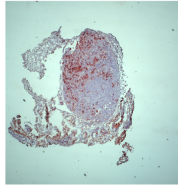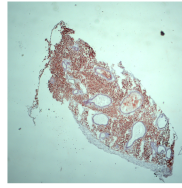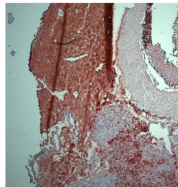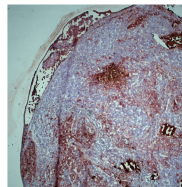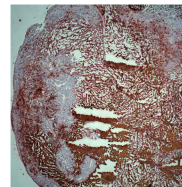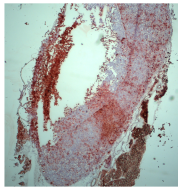

**control tumors**

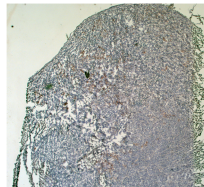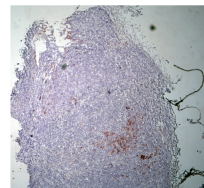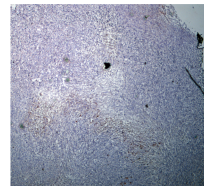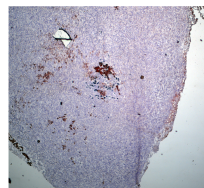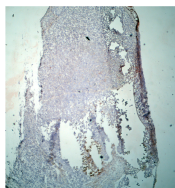

Supplement: bcr2221-S5.pdf [file bcr2221-S5.pdf]
