# Supplementary material for: Human antimicrobial protein hCAP18/LL-37 promotes a metastatic phenotype in breast cancer
Source: PubMed Central journal article supplement (PMC2687709; doi:10.1186/bcr2221), 2009-01-30

(a)

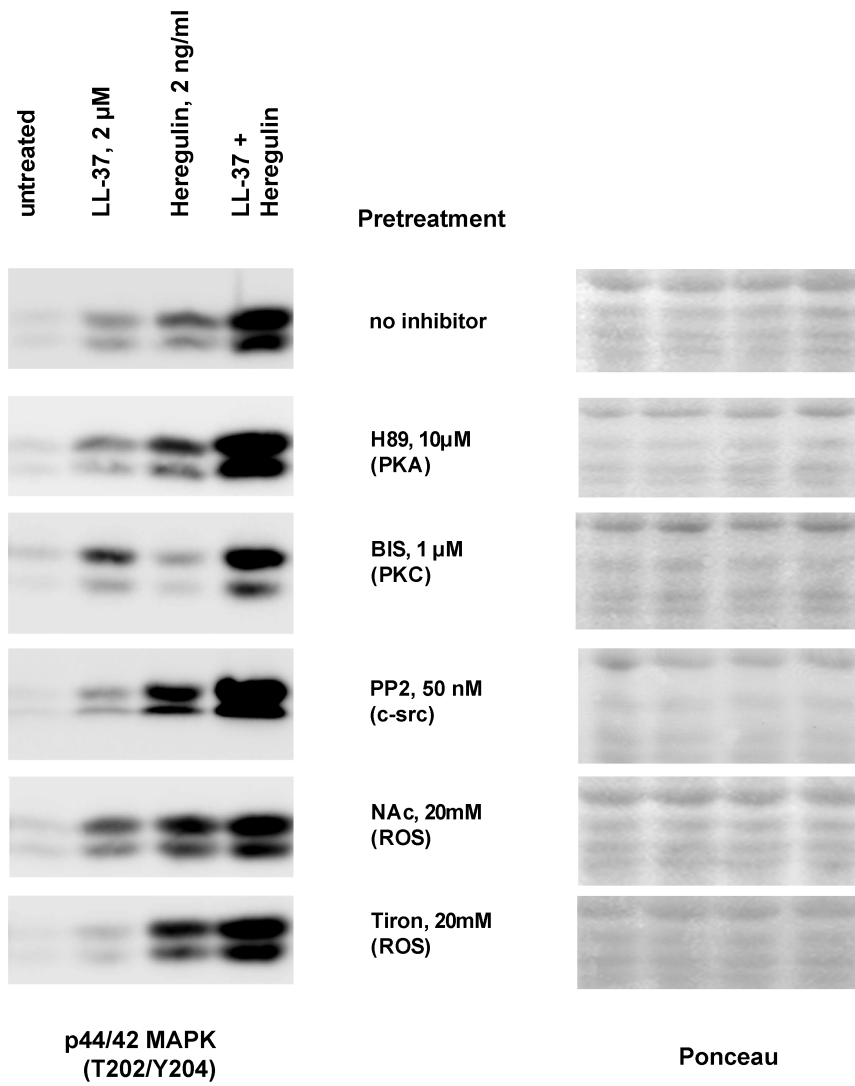

(b)

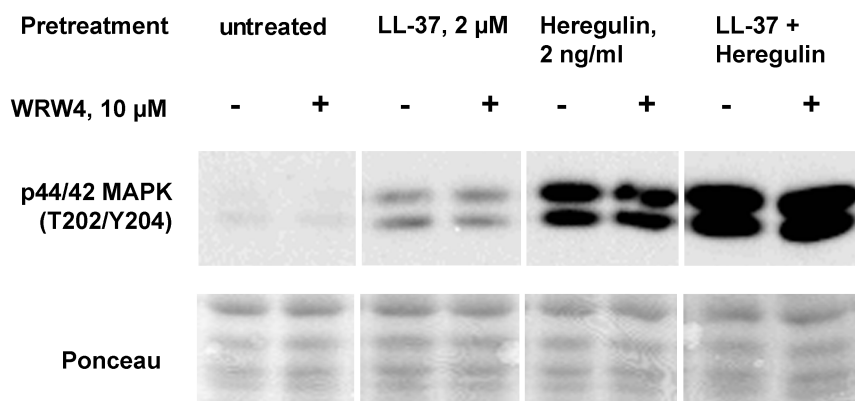

Supplement: bcr2221-S3.pdf [file bcr2221-S3.pdf]
