# Supplementary material for: Human antimicrobial protein hCAP18/LL-37 promotes a metastatic phenotype in breast cancer
Source: PubMed Central journal article supplement (PMC2687709; doi:10.1186/bcr2221), 2009-01-30
Supplement: bcr2221-S4.pdf [file bcr2221-S4.pdf]

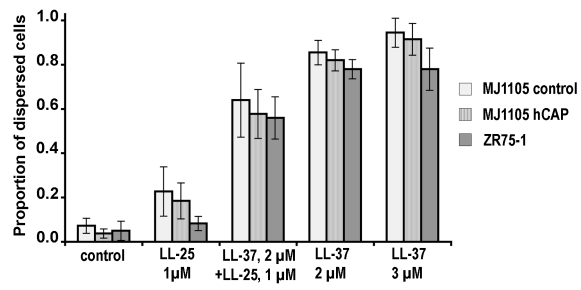

Additional data file 4
